# Supplementary material
Source: Springer Nature journal article supplement (https://www.springermedizin.de/resource/supplementary/12885_2008_1167_MOESM15_ESM.pdf/9471296)

normal lung  
- negative -

Adenocarcinoma  
- positive -

Adenocarcinoma  
- negative -

Squamous Cell  
Carcinoma  
- positive -

Squamous Cell  
Carcinoma  
- negative -

BiP

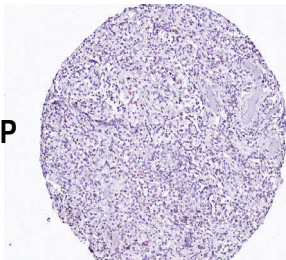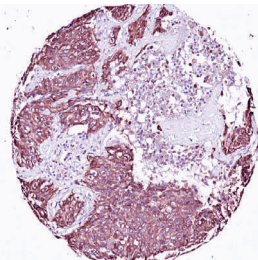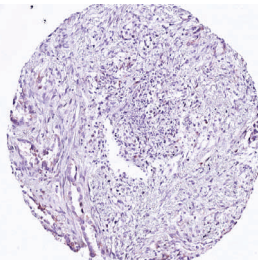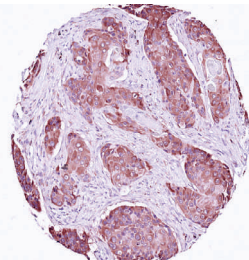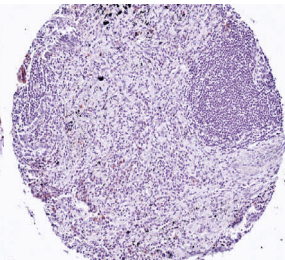

pEIF2 $\alpha$

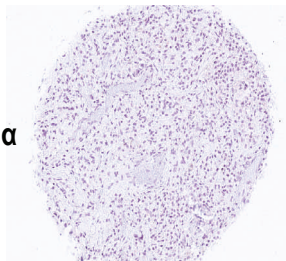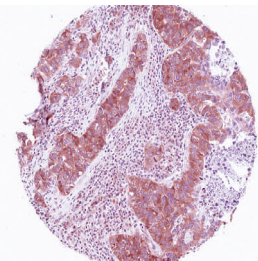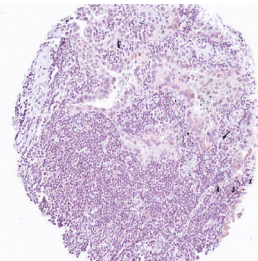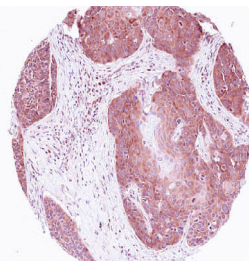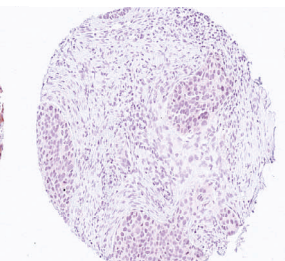

EIF2 $\alpha$

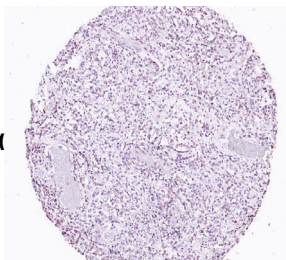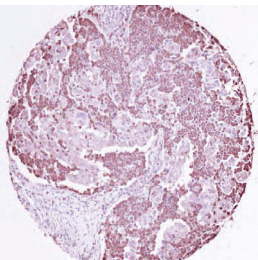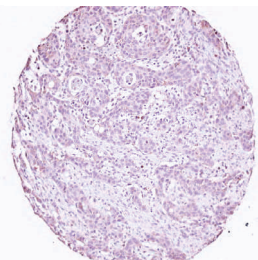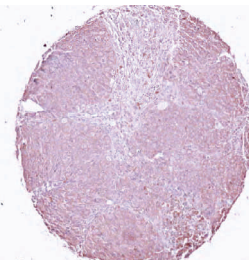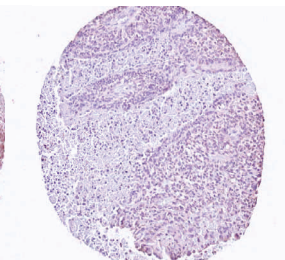

Supplement: MOESM15 [file 9471296]
